# Supplementary material for: Effect of Polishing on Electrochemical Behavior and Passive Layer Composition of Different Stainless Steels
Source: PubMed Central journal article supplement (PMC7435799; doi:10.3390/ma13153402), 2020-08-01
Supplement: materials-13-03402-s001.pdf [file materials-13-03402-s001.pdf]

*Article*

# **Effect of Polishing on Electrochemical Behavior and Passive Layer Composition of Different Stainless Steels**

Supplementary files:

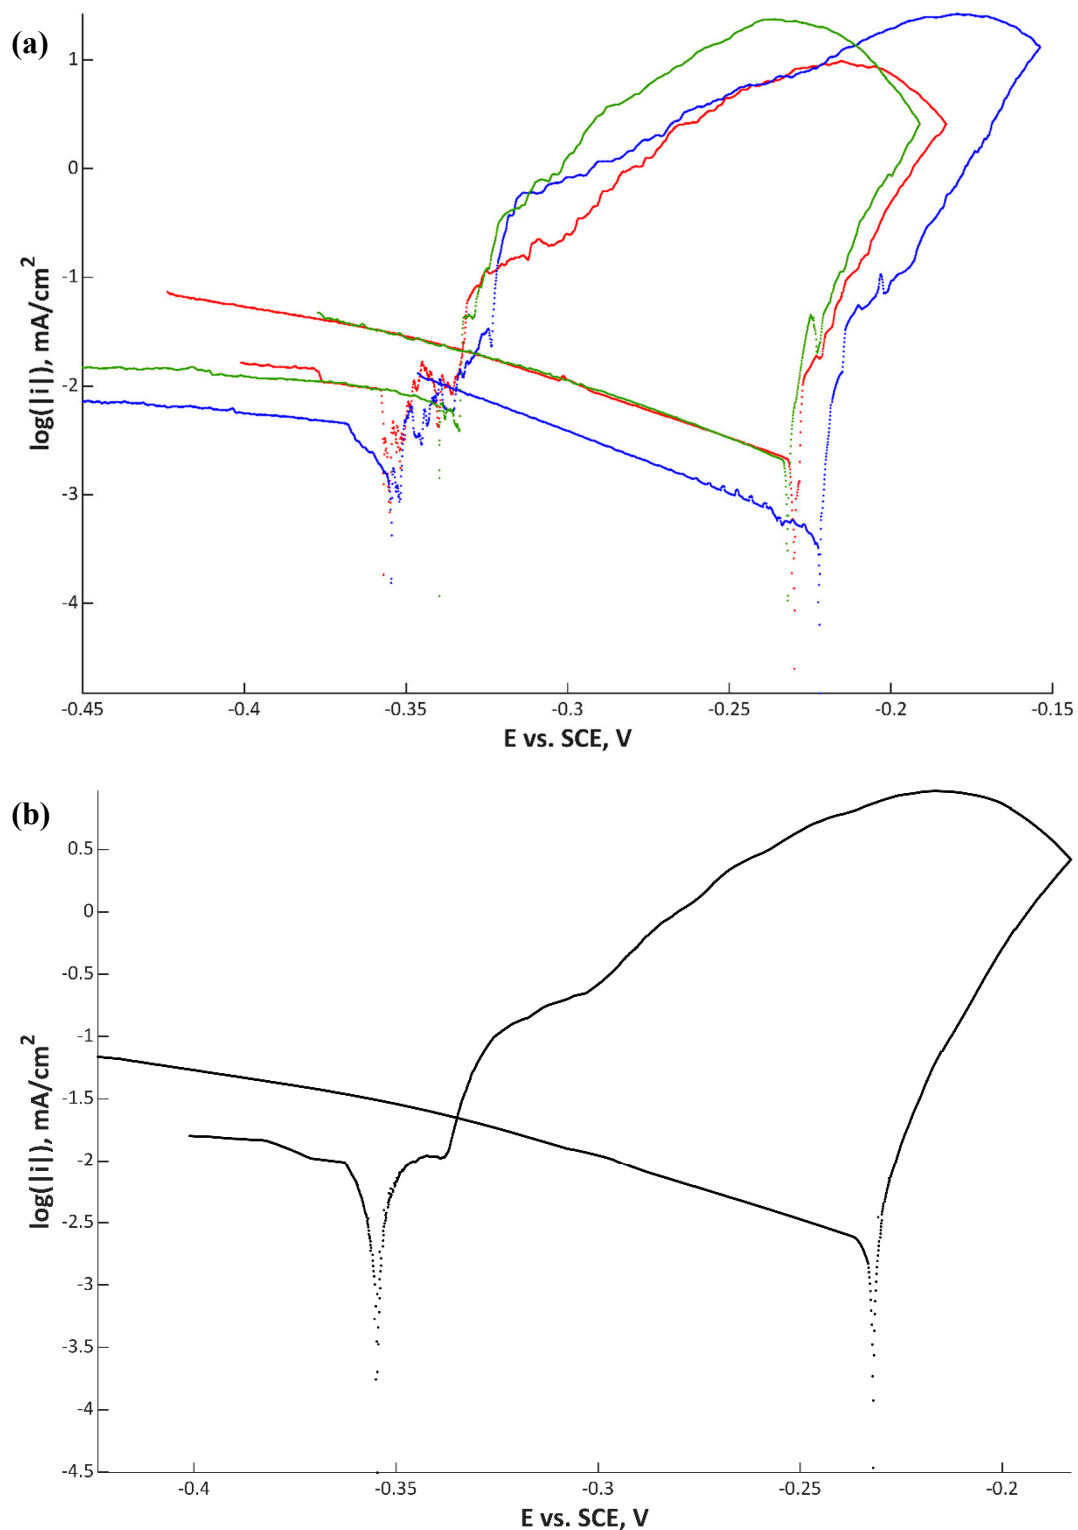

**Figure S1.** Polarization curves of passive layers of mechanically polished 18Cr21Mn2NiN stainless steel in aerated water solution with NaCl (80000 ppm  $C_{Cl^-}$ , pH = 7; 80 °C, 200 mV/h); three colors mean three measurements at the same point in the experiment plan (a), one curve signifies the use of moving average (b).

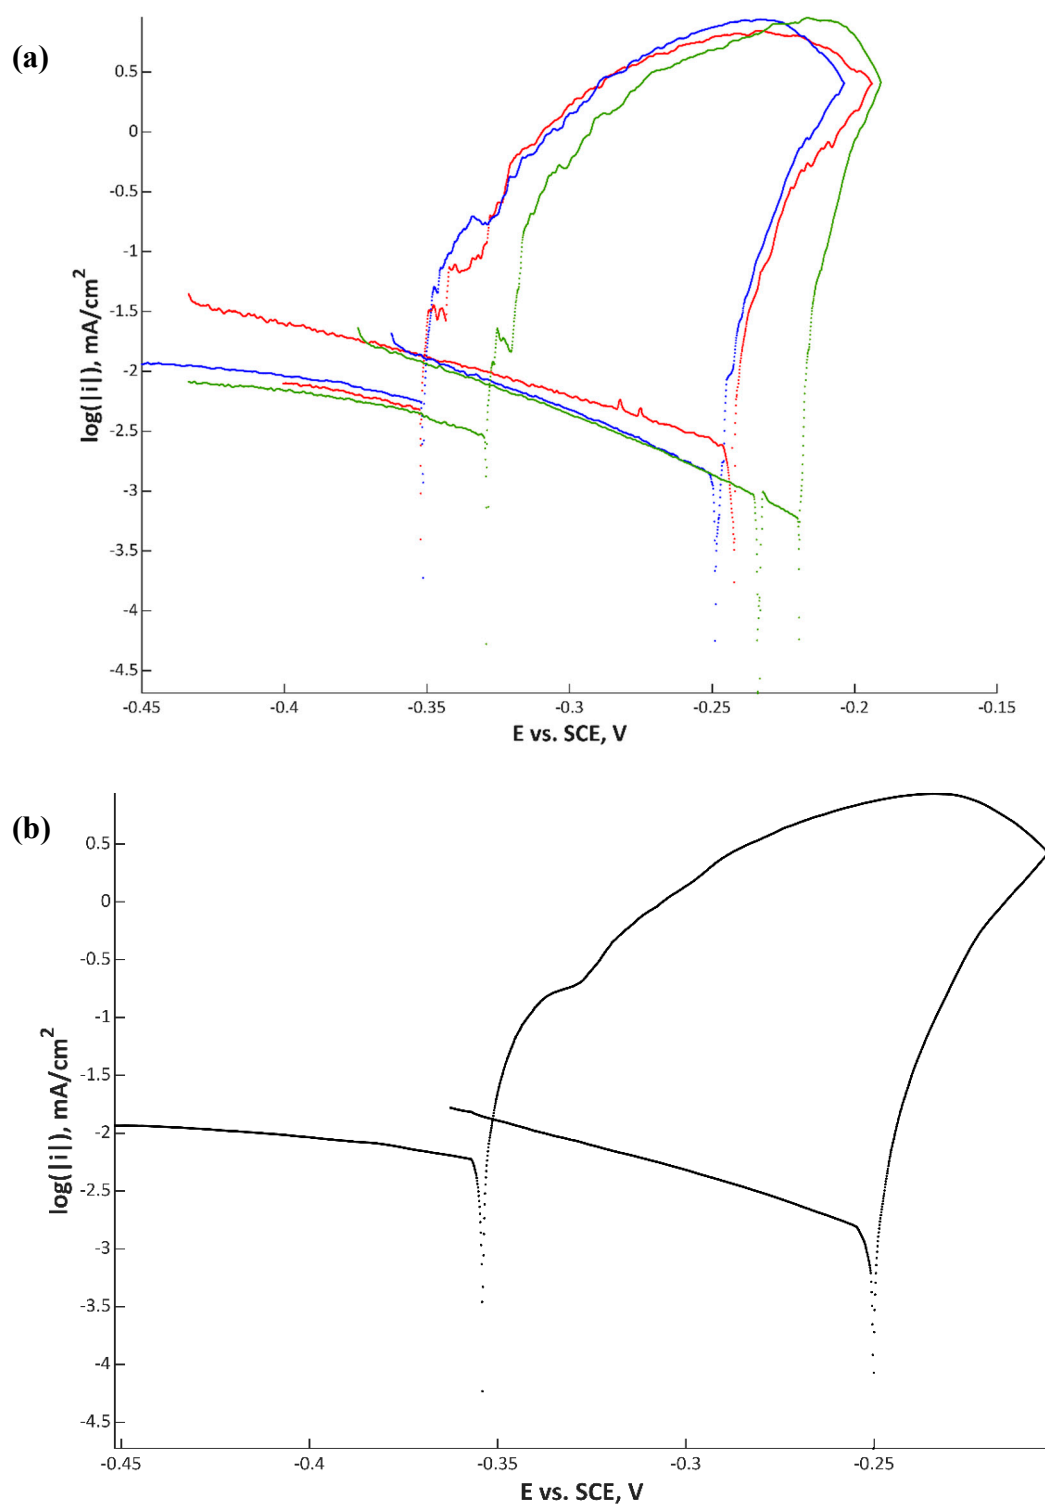

**Figure S2.** Polarization curves of passive layers of electropolished 18Cr21Mn2NiN stainless steel in aerated water solution with NaCl (80000 ppm  $C_{Cl^-}$ , pH = 7; 80 °C, 200 mV/h); three colors mean three measurements at the same point in the experiment plan (a), one curve signifies the use of moving average (b).

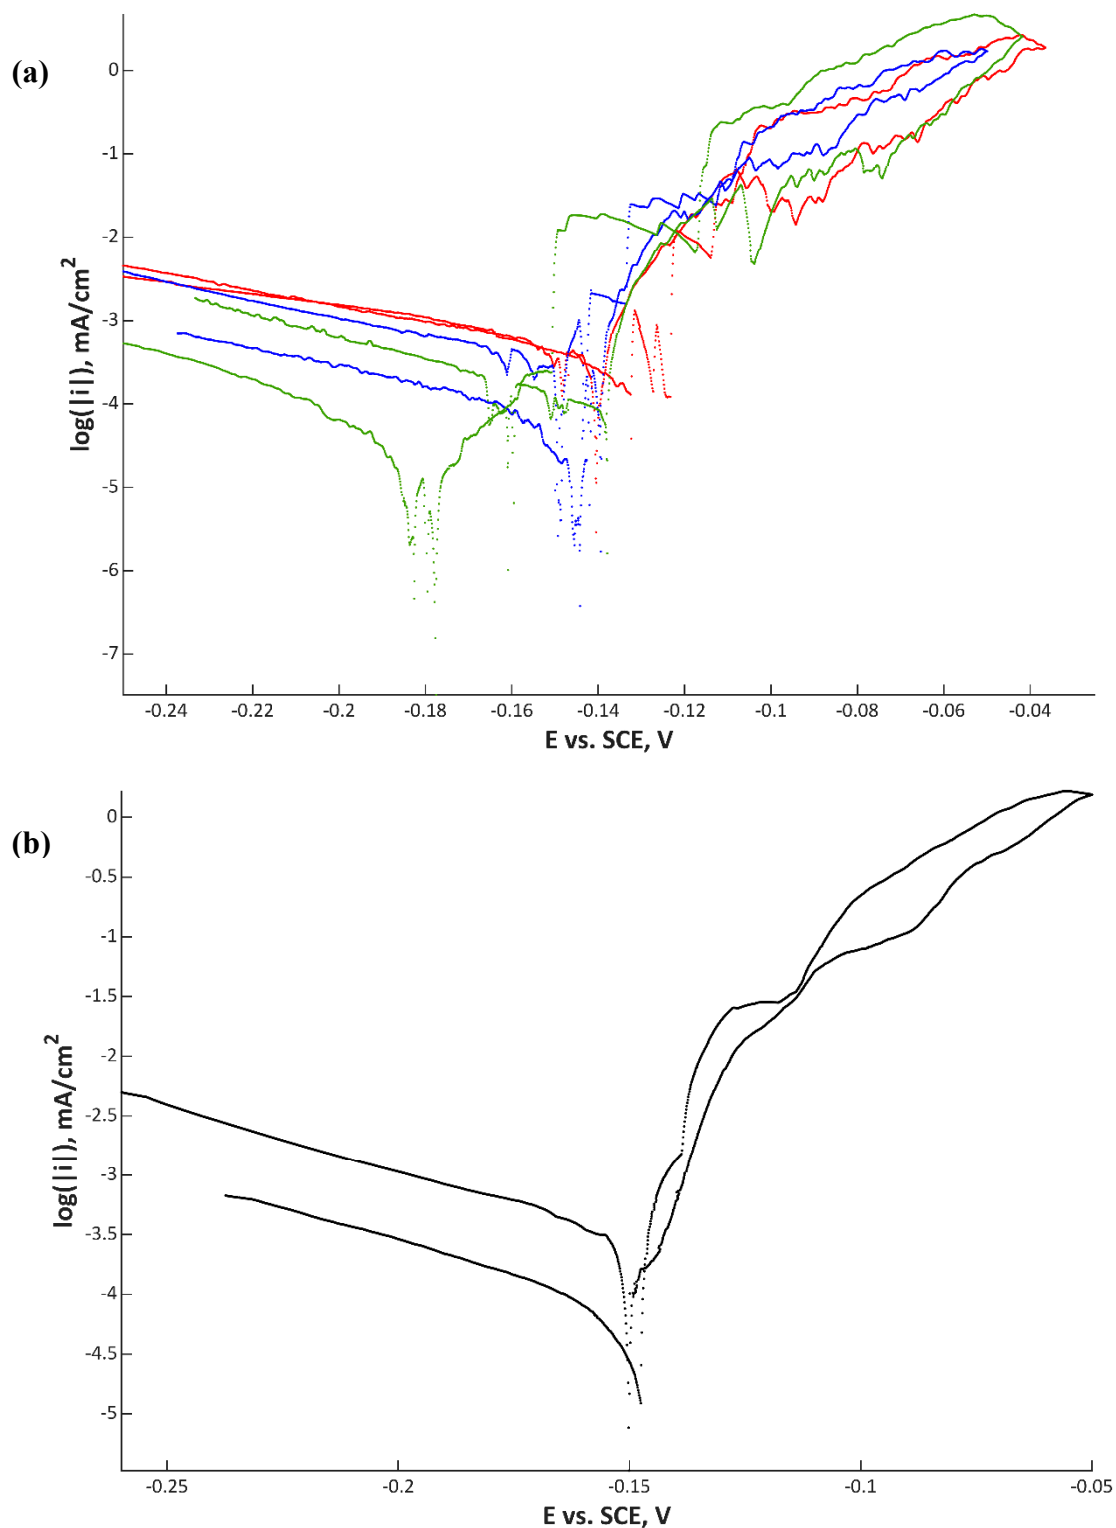

**Figure S3.** Polarization curves of passive layers of mechanically polished 20Cr20Mn7Ni2MoN stainless steel in aerated water solution with NaCl (80000 ppm  $\text{Cl}^-$ , pH = 7; 80 °C, 200 mV/h); three colors mean three measurements at the same point in the experiment plan (a), one curve signifies the use of moving average (b).

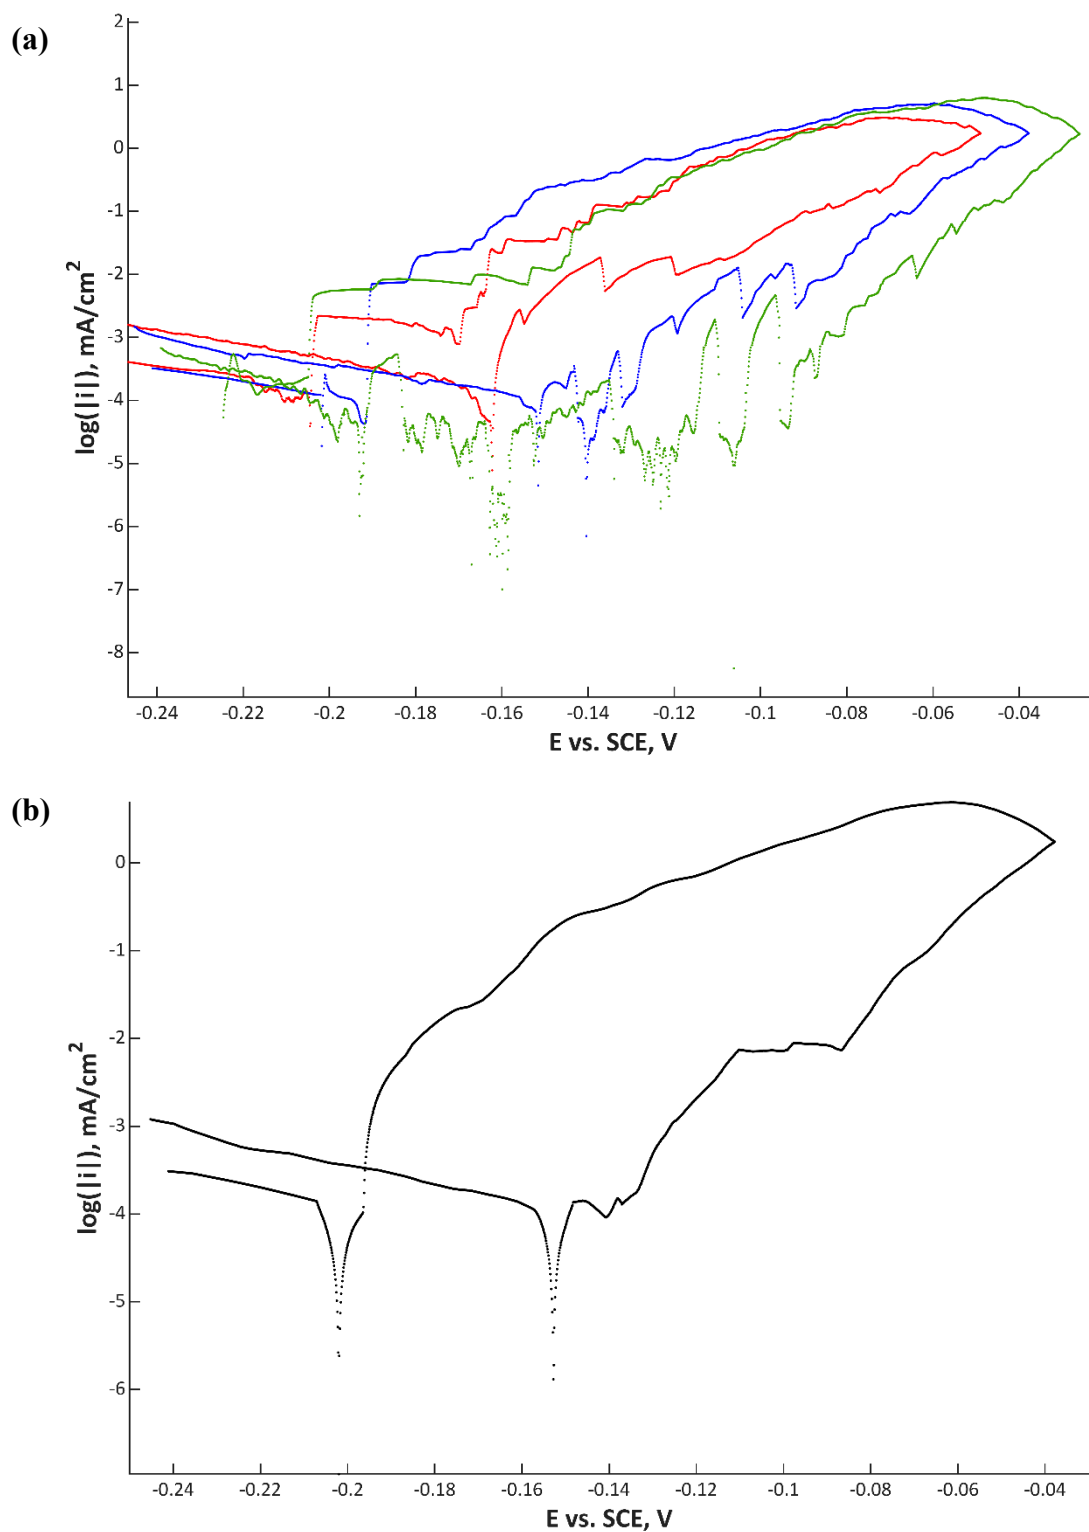

**Figure S4.** Polarization curves of passive layers of electropolished 20Cr20Mn7Ni2MoN stainless steel in aerated water solution with NaCl (80000 ppm  $\text{Cl}^-$ , pH = 7; 80 °C, 200 mV/h); three colors mean three measurements at the same point in the experiment plan (a), one curve signifies the use of moving average (b).

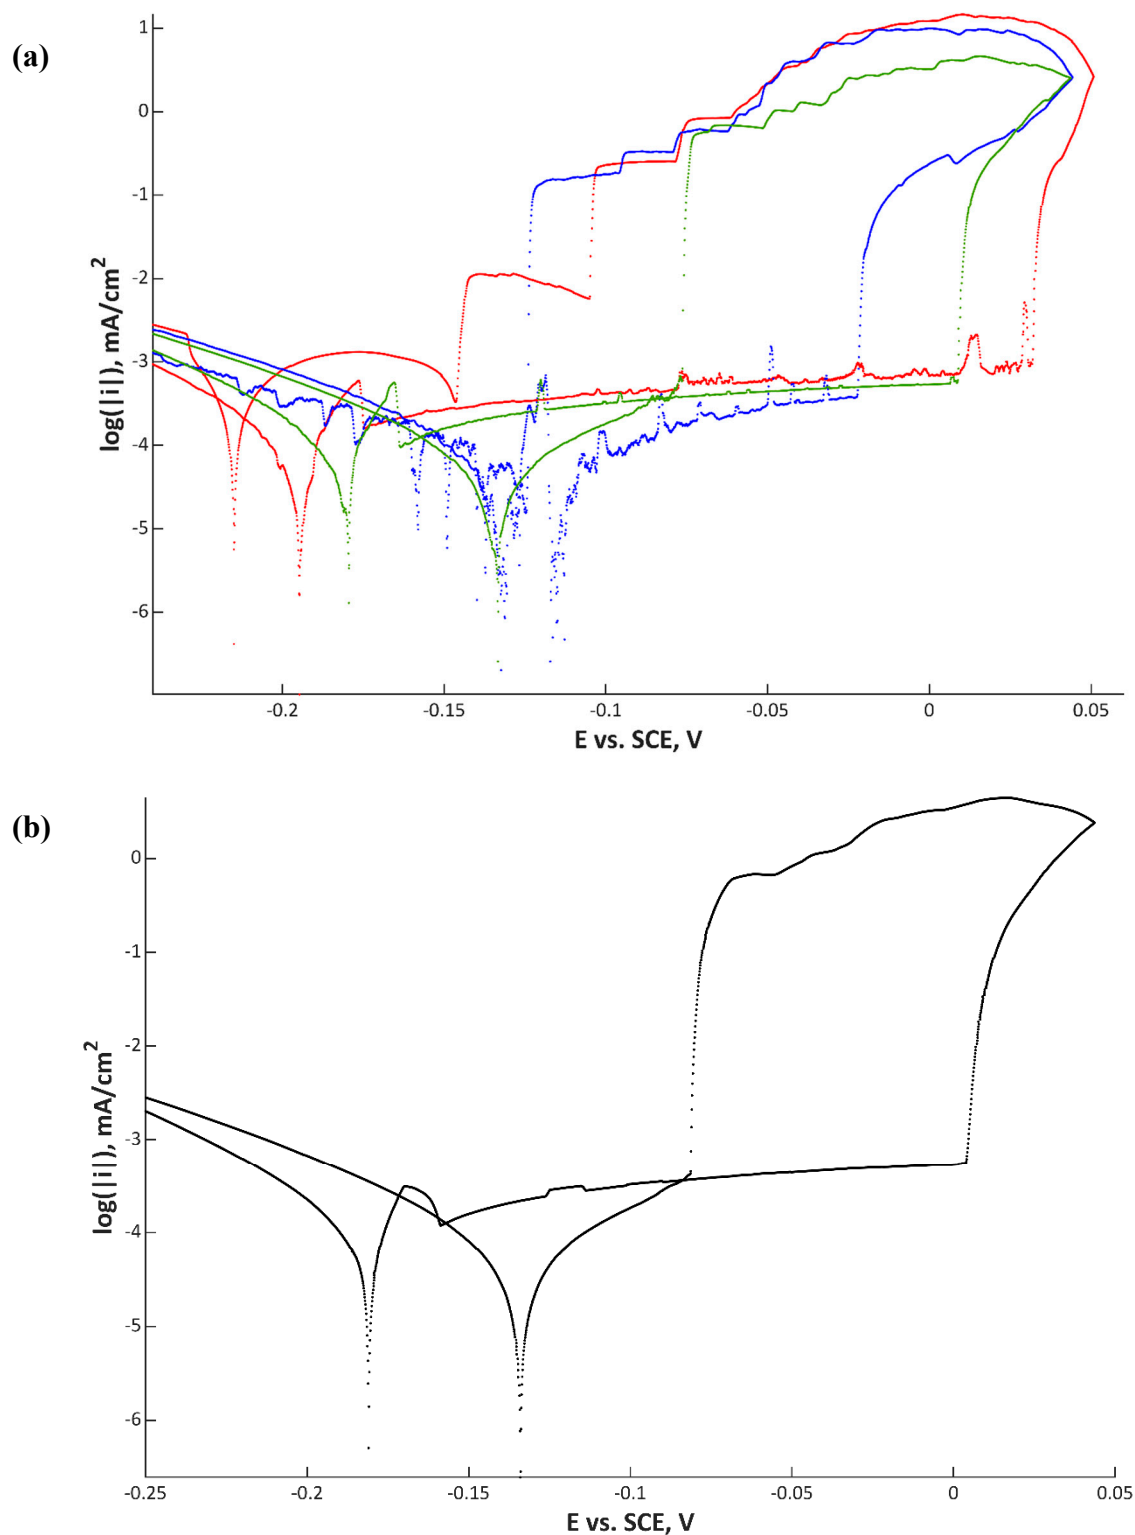

**Figure S5.** Polarization curves of passive layers of mechanically polished 18Cr15Ni3Mo stainless steel in aerated water solution with NaCl (80000 ppm  $C_{Cl^-}$ , pH = 7; 80 °C, 200 mV/h); three colors mean three measurements at the same point in the experiment plan (a), one curve signifies the use of moving average (b).

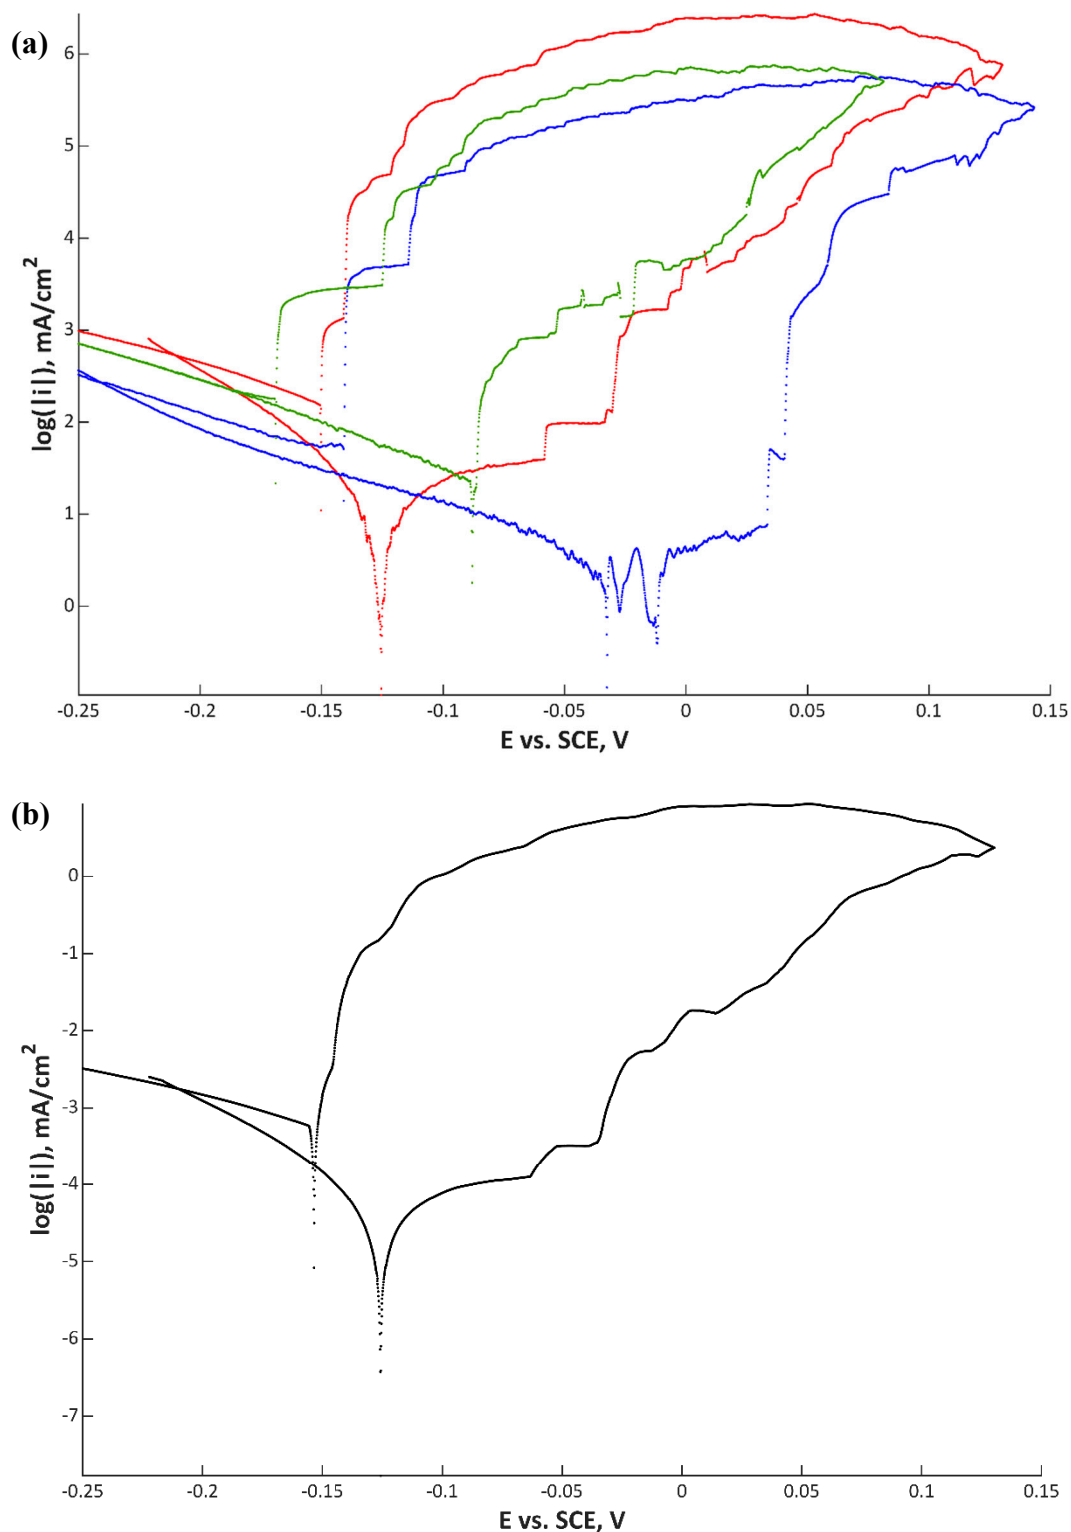

**Figure S6.** Polarization curves of passive layers of electropolished 18Cr15Ni3Mo stainless steel in aerated water solution with NaCl (80000 ppm  $C_{Cl^-}$ , pH = 7; 80 °C, 200 mV/h); three colors mean three measurements at the same point in the experiment plan (a), one curve signifies the use of moving average (b).

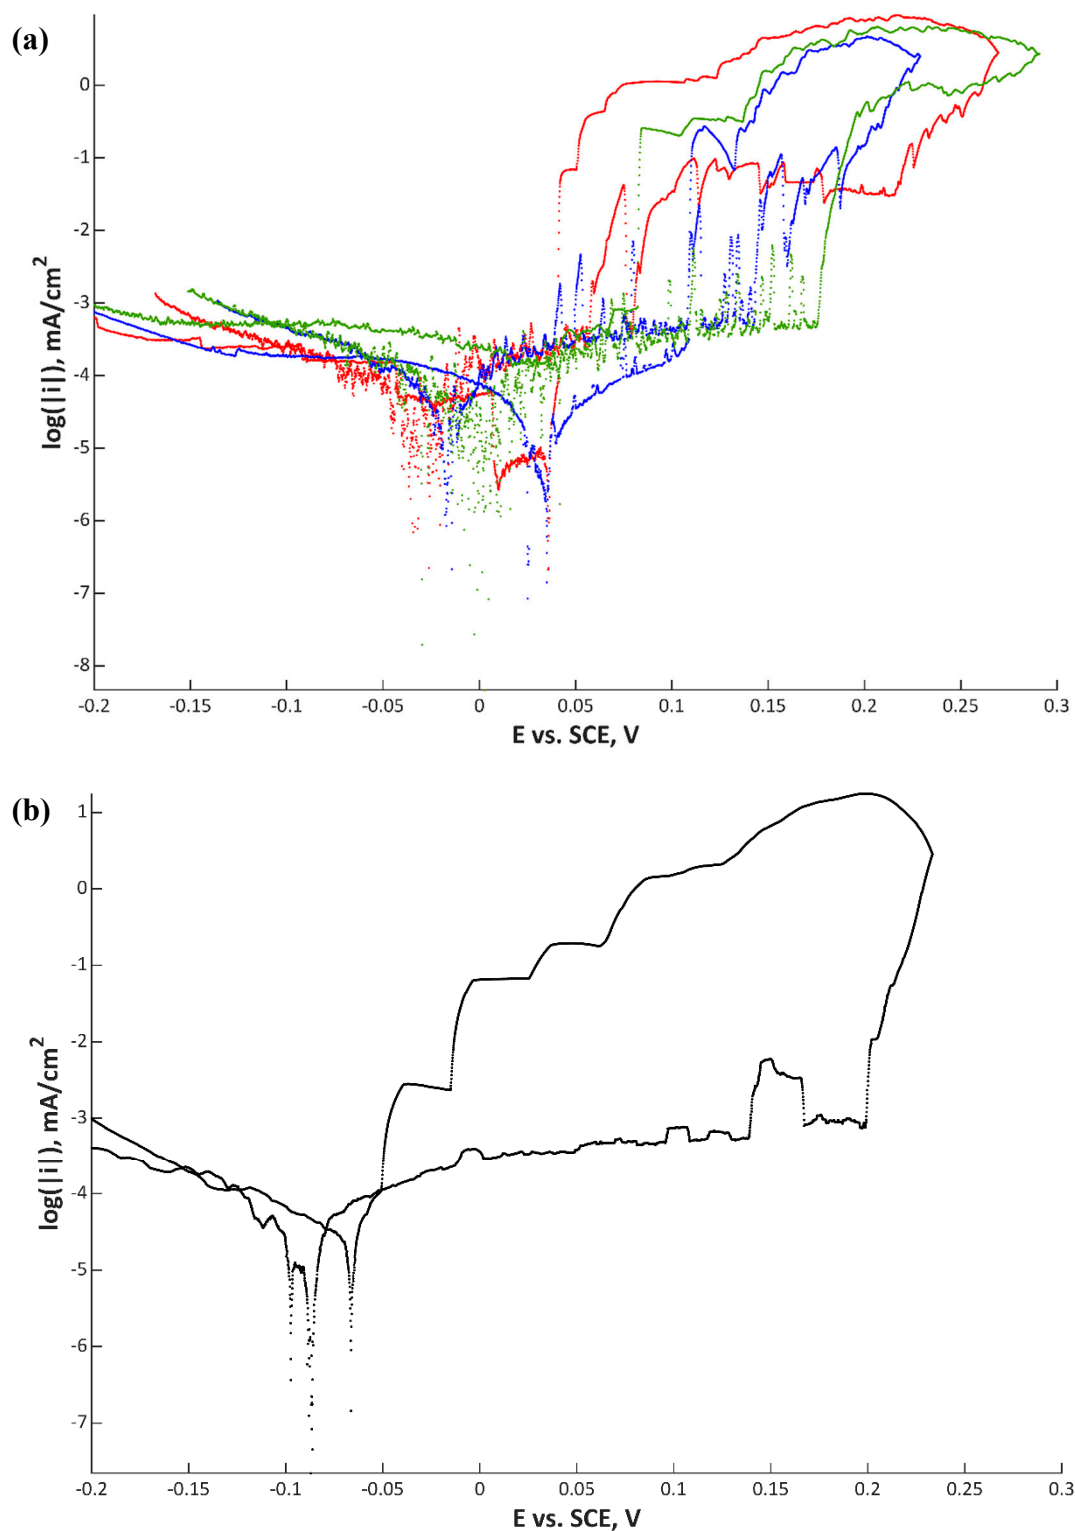

**Figure S7.** Polarization curves of passive layers of mechanically polished 27Cr29Ni3Mo stainless steel in aerated water solution with NaCl (80000 ppm  $C_{Cl^-}$ , pH = 7; 80 °C, 200 mV/h); three colors mean three measurements at the same point in the experiment plan (a), one curve signifies the use of moving average (b).



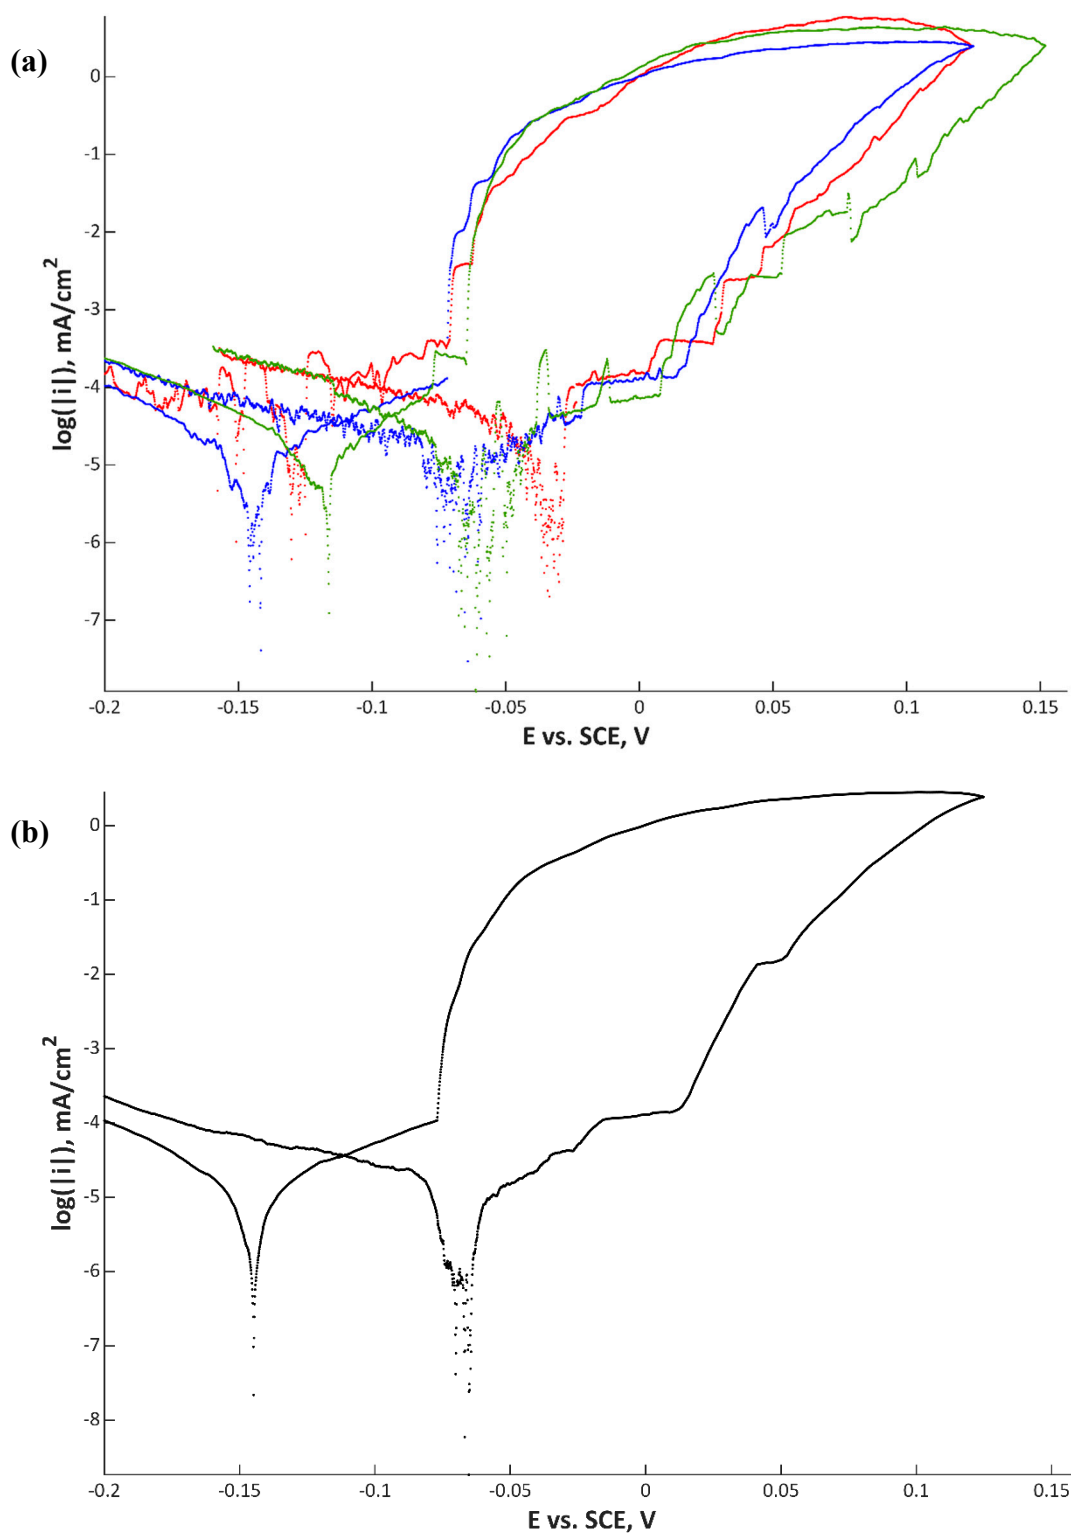

**Figure S8.** Polarization curves of passive layers of electropolished 27Cr29Ni3Mo stainless steel in aerated water solution with NaCl (80000 ppm  $C_{Cl^-}$ , pH = 7; 80 °C, 200 mV/h); three colors mean three measurements at the same point in the experiment plan (a), one curve signifies the use of moving average (b).

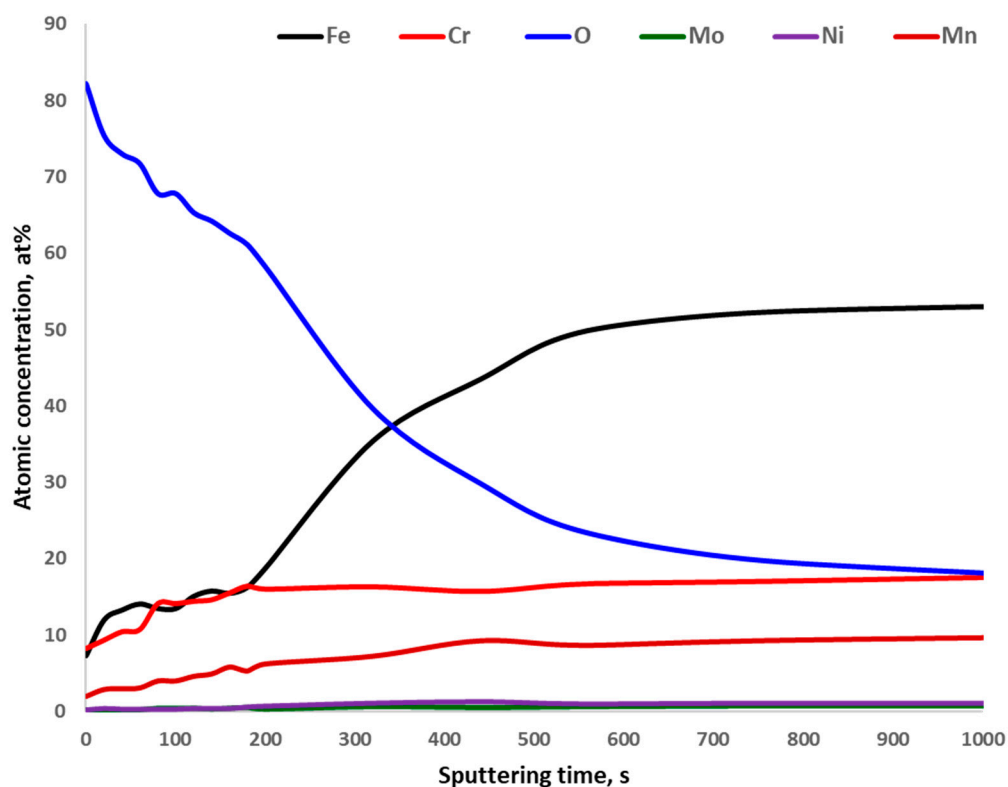

**Figure S9.** XPS depth profiling results of the passive layer of mechanically polished 18Cr21Mn2NiN stainless steel, 91.6 s  $\approx$  1 nm.

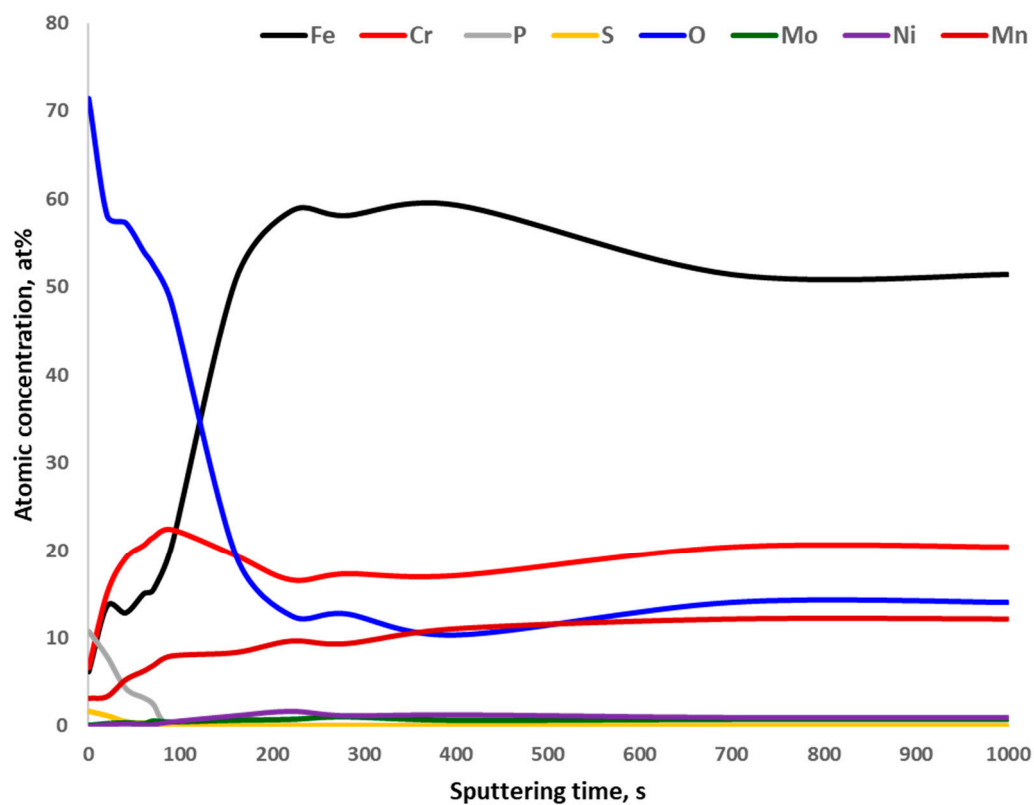

**Figure S10.** XPS depth profiling results of the passive layer of electropolished 18Cr21Mn2NiN stainless steel, 91.6 s  $\approx$  1 nm.

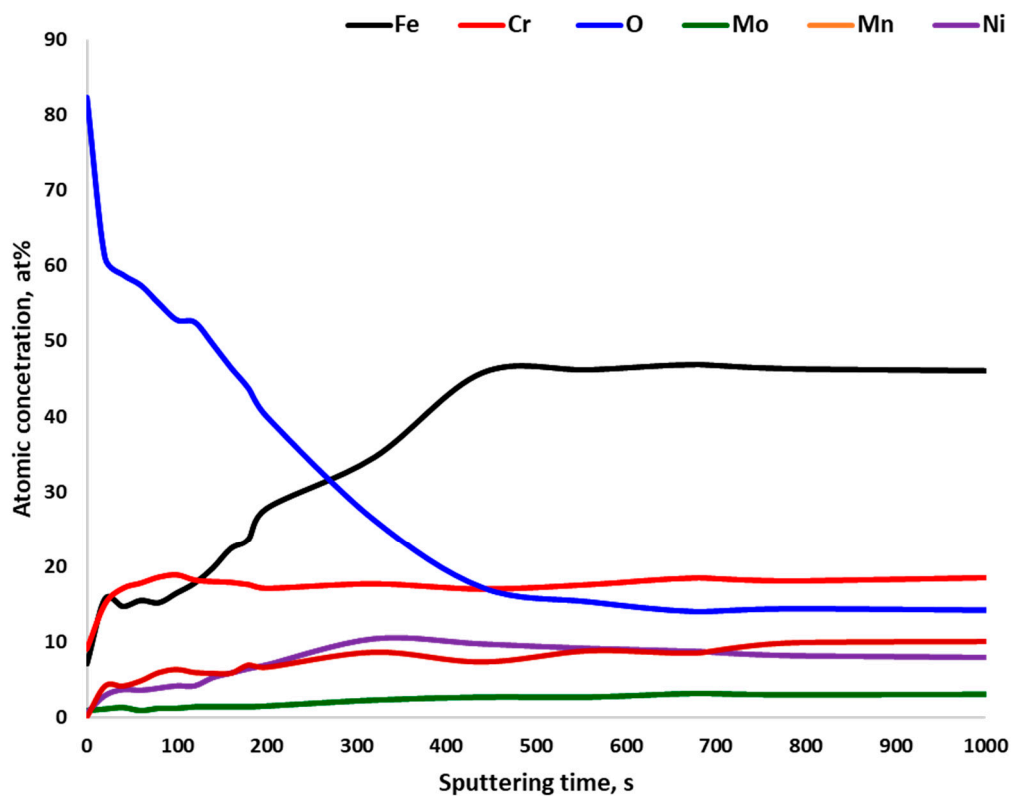

**Figure S11.** XPS depth profiling results of the passive layer of mechanically polished 20Cr20Mn7Ni2MoN stainless steel, 91.6 s  $\approx$  1 nm.

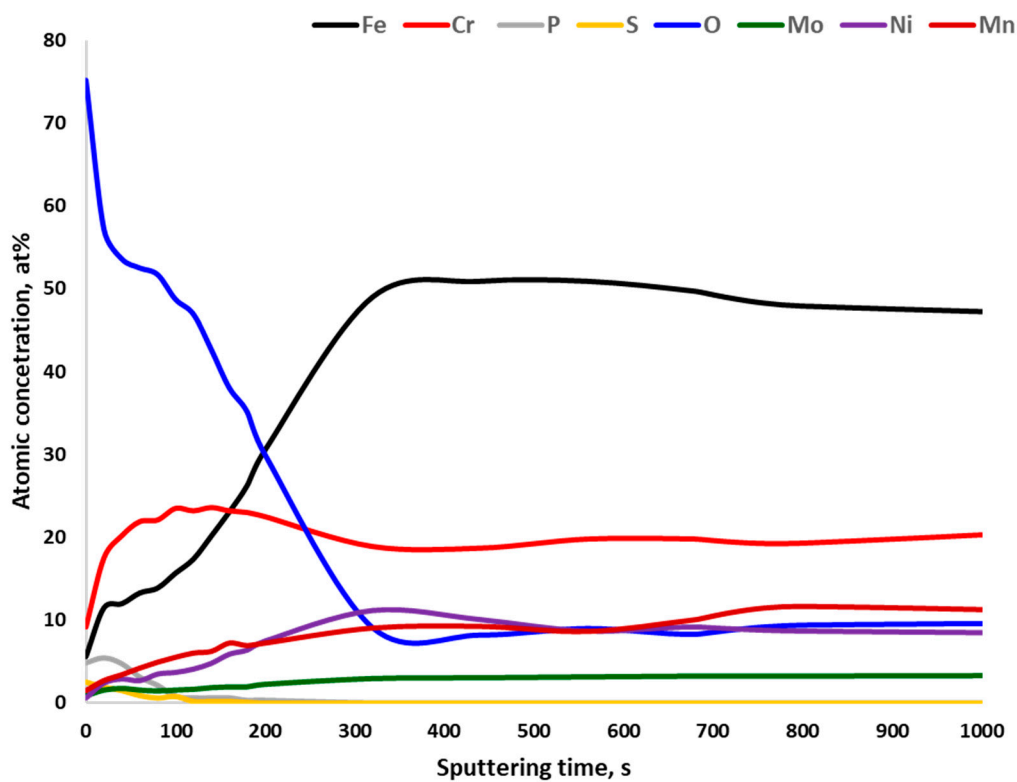

**Figure S12.** XPS depth profiling results of the passive layer of electropolished 20Cr20Mn7Ni2MoN stainless steel, 91.6 s  $\approx$  1 nm.

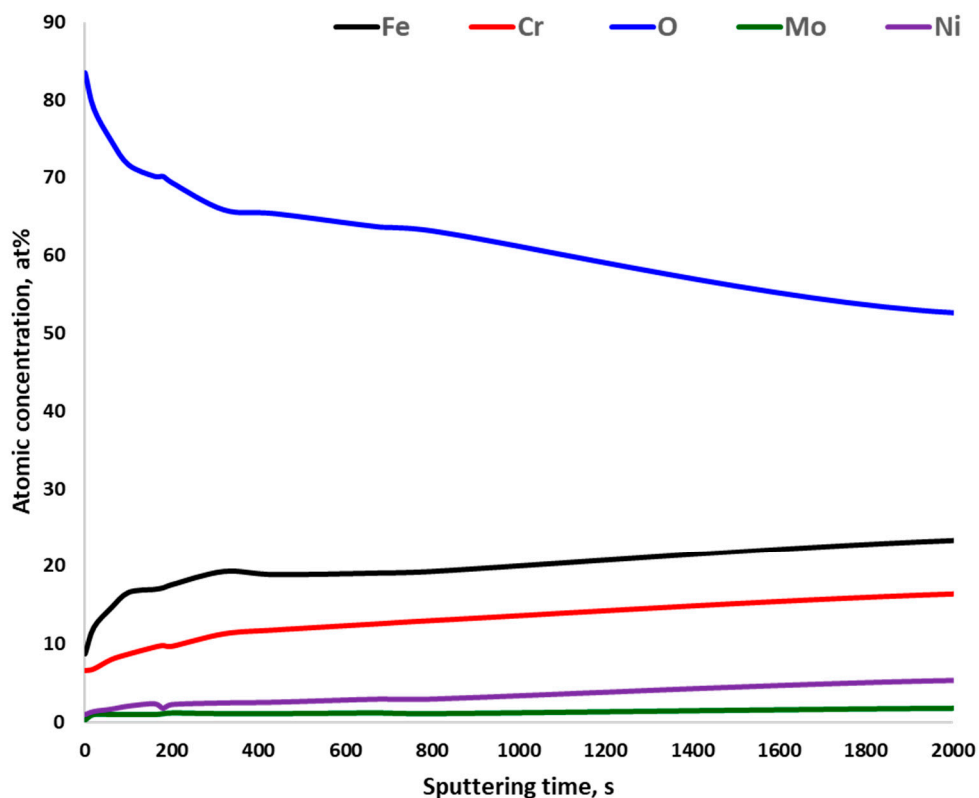

Figure S13. XPS depth profiling results of the passive layer of mechanically polished 18Cr15Ni3Mo stainless steel, 91.6 s  $\approx$  1 nm.

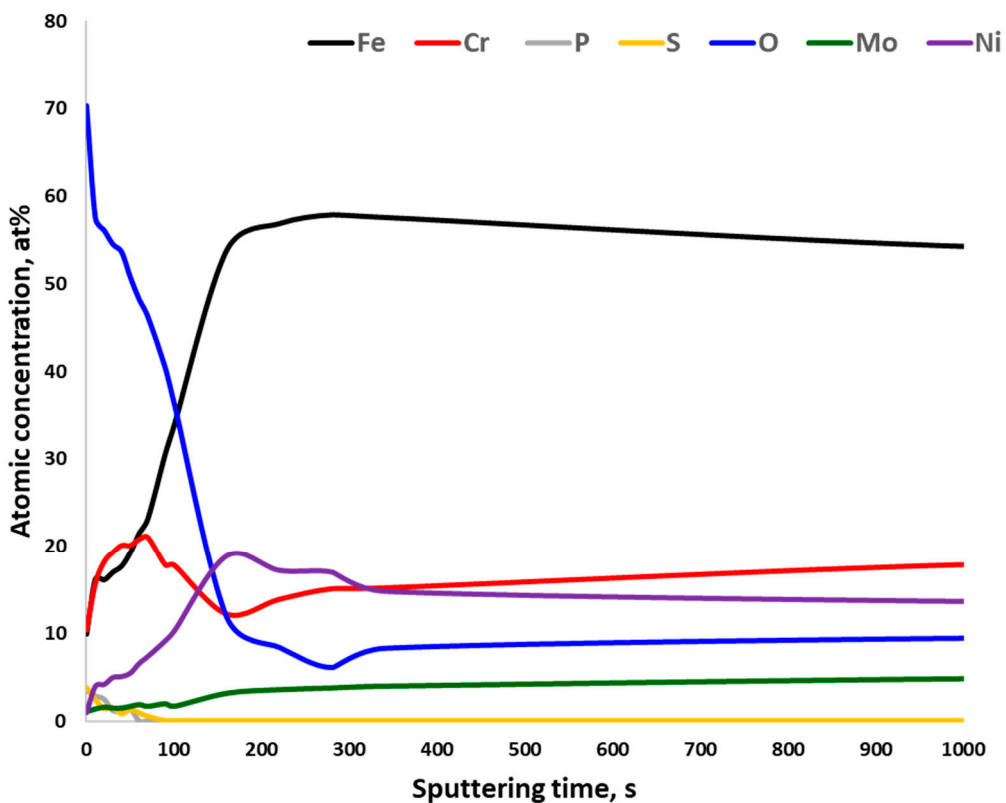

Figure S14. XPS depth profiling results of the passive layer of electropolished 18Cr15Ni3Mo stainless steel, 91.6 s  $\approx$  1 nm.

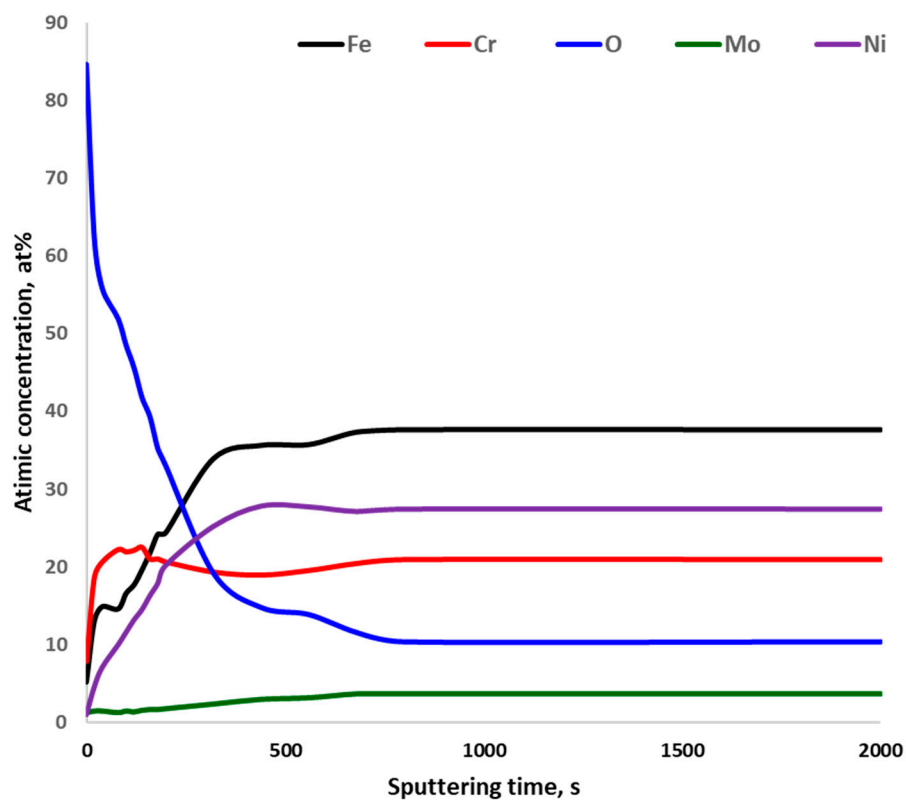

**Figure S15.** XPS depth profiling results of the passive layer of mechanically polished 27Cr29Ni3Mo stainless steel, 91.6 s  $\approx$  1 nm.

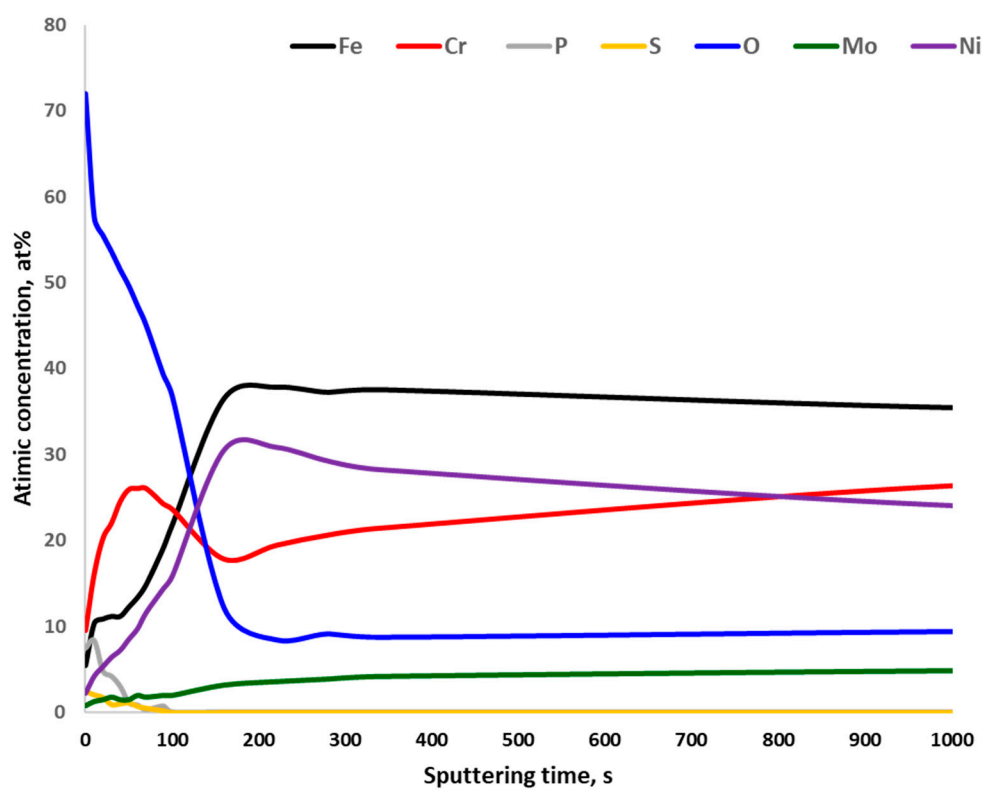

**Figure S16.** XPS depth profiling results of the passive layer of electropolished 27Cr29Ni3Mo stainless steel, 91.6 s  $\approx$  1 nm.

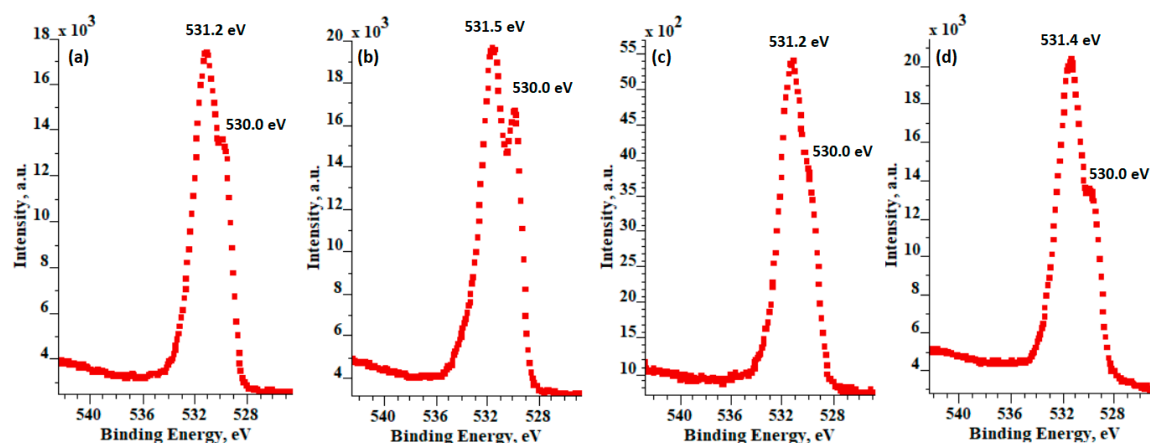

**Figure S17.** Oxygen O1s XPS spectra of the passive layer of mechanically ground stainless steels: (a) 18Cr21Mn2NiN, (b) 20Cr20Mn7Ni2MoN, (c) 18Cr15Ni3Mo, (d) 27Cr29Ni3Mo.

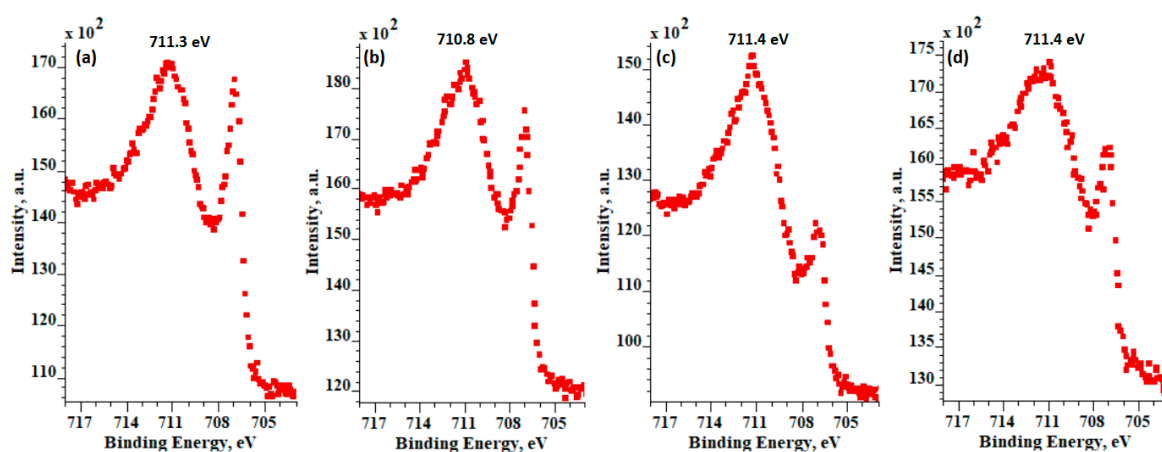

**Figure S18.** Iron Fe2p<sub>3/2</sub> XPS spectra of the passive layer of mechanically ground stainless steels: (a) 18Cr21Mn2NiN, (b) 20Cr20Mn7Ni2MoN, (c) 18Cr15Ni3Mo, (d) 27Cr29Ni3Mo.

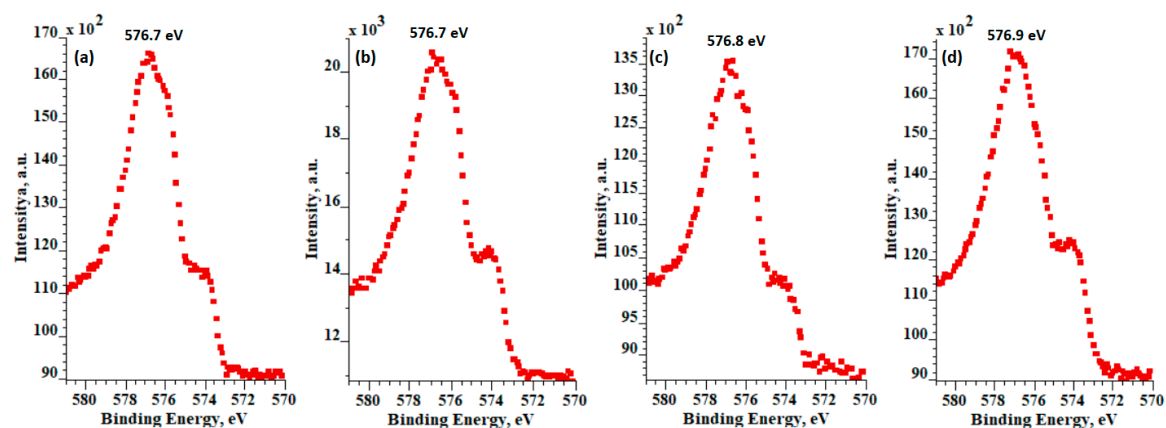

**Figure S19.** Chromium Cr2p<sub>3/2</sub> XPS spectra of passive layer of mechanically ground stainless steels: (a) 18Cr21Mn2NiN, (b) 20Cr20Mn7Ni2MoN, (c) 18Cr15Ni3Mo, (d) 27Cr29Ni3Mo.

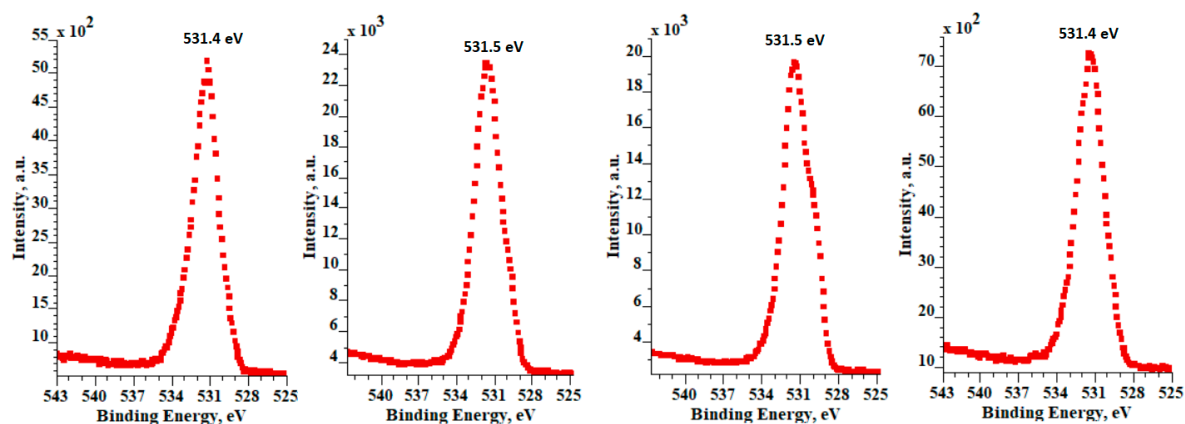

**Figure S20.** Oxygen O1s XPS spectra of the passive layer of electropolished stainless steels: (a) 18Cr21Mn2NiN, (b) 20Cr20Mn7Ni2MoN, (c) 18Cr15Ni3Mo, (d) 27Cr29Ni3Mo.

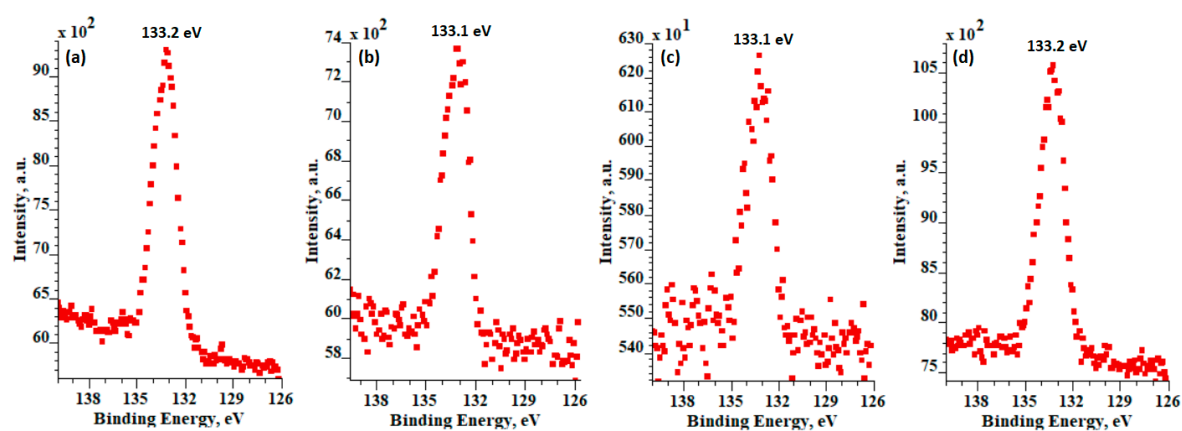

**Figure S21.** Phosphorus P2p XPS spectra of the passive layer of electropolished stainless steels: (a) 18Cr21Mn2NiN, (b) 20Cr20Mn7Ni2MoN, (c) 18Cr15Ni3Mo, (d) 27Cr29Ni3Mo.

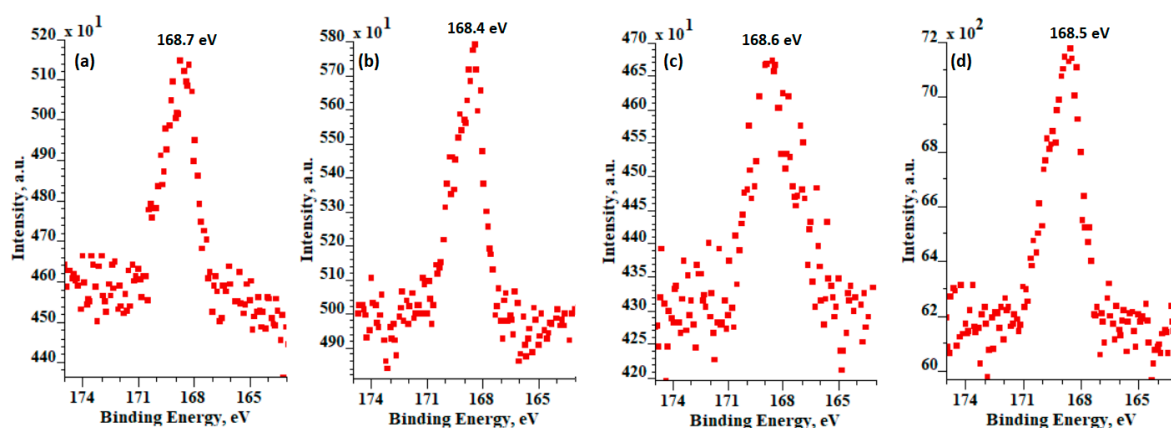

**Figure S22.** Sulphur S2p XPS spectra of the passive layer of electropolished stainless steels: (a) 18Cr21Mn2NiN, (b) 20Cr20Mn7Ni2MoN, (c) 18Cr15Ni3Mo, (d) 27Cr29Ni3Mo.

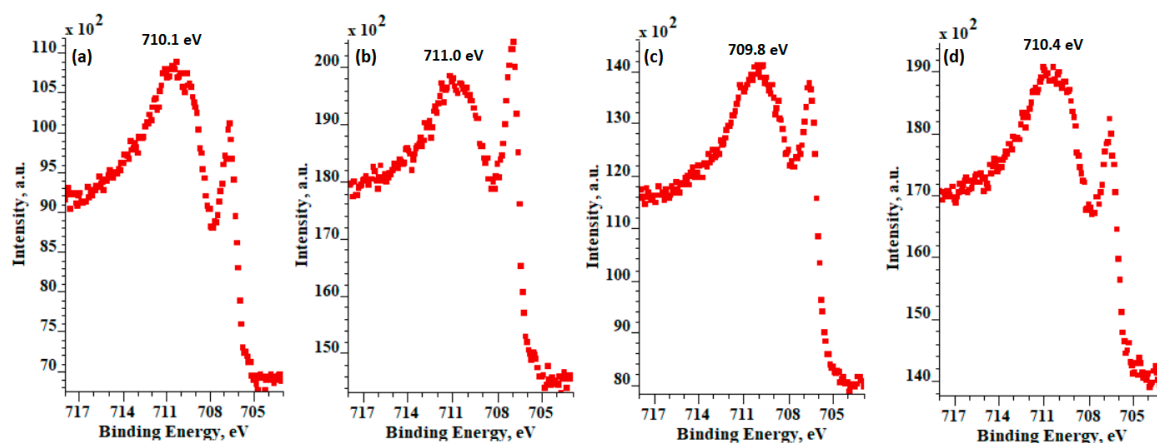

**Figure S23.** Iron  $\text{Fe}2p_{3/2}$  XPS spectra of the passive layer of electropolished stainless steels: (a) 18Cr21Mn2NiN, (b) 20Cr20Mn7Ni2MoN, (c) 18Cr15Ni3Mo, (d) 27Cr29Ni3Mo.

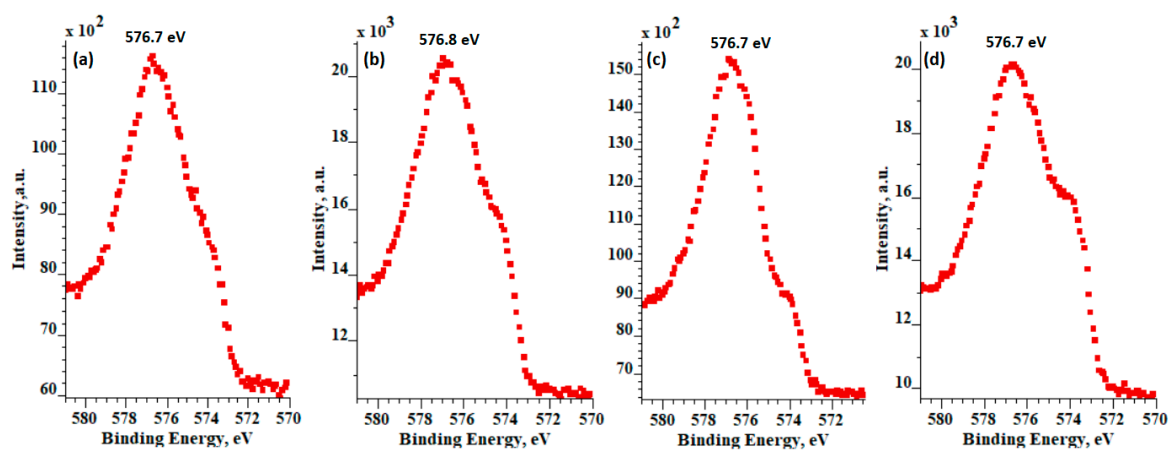

**Figure S24.** Chromium  $\text{Cr}2p_{3/2}$  XPS spectra of the passive layer of electropolished stainless steels: (a) 18Cr21Mn2NiN, (b) 20Cr20Mn7Ni2MoN, (c) 18Cr15Ni3Mo, (d) 27Cr29Ni3Mo

**Table S1.** Binding energies (BE, eV) of iron, chromium compounds.

|                              | $\text{Fe}2p_{3/2}$ | $\text{P}2p$ | $\text{S}2p$ | $\text{O}1s$ |                              | $\text{Cr}2p_{3/2}$ | $\text{P}2p$ | $\text{S}2p$ | $\text{O}1s$ |
|------------------------------|---------------------|--------------|--------------|--------------|------------------------------|---------------------|--------------|--------------|--------------|
| $\text{Fe}^0$                | 706.6–707           | –            | –            | –            | $\text{Cr}^0$                | 574.2–574.4         | –            | –            | –            |
| $\text{FeO}$                 | 709.4               | –            | –            | 530.0        | $\text{Cr}_2\text{O}_3$      | 576.4–576.8         | –            | –            | 530.2        |
| $\text{Fe}_2\text{O}_3$      | 710.9               | –            | –            | 530.0        | $\text{CrOOH}$               | 576.8–577.0         | –            | –            | 531.4        |
| $\text{FeOOH}$               | 711.3–711.8         | –            | –            | 530.0        | $\text{Cr}(\text{OH})_3$     | 577.2–577.3         | –            | –            | 531.2        |
| $\text{FeSO}_4$              | 711.0–712           | –            | 169.1        | 532.2        | $\text{CrO}_3$               | 579.2               | –            | –            | 530.1        |
| $\text{Fe}_2(\text{SO}_4)_3$ | 713.4–713.5         | –            | –            | 531.8        | $\text{CrO}_4^{2-}$          | 579.0–579.5         | –            | –            | –            |
| $\text{FePO}_4$              | 712.7               | 133.1        | –            | 532.0        | $\text{Cr}_2(\text{SO}_4)_3$ | 578.5               | –            | 169.5        | 532.0        |
| $\text{Fe}_3(\text{PO}_4)_2$ | 712.5               | 133.3        | –            | 532.0        | $\text{CrPO}_4$              | 577.9               | 133.7        | –            | –            |

#### Reference

1. NIST. ODI SRDATA Links. Available online: <https://srdata.nist.gov/> (accessed on 31 July 2020)
